# Supplementary material
Source: HighWire-hosted journal article supplement (https://qualitysafety.bmj.com/content/26/4/296)
Supplement: inline-supplementary-material-1 [file inline-supplementary-material-1.pdf]

| Host organization                              | Name of QI repository                                                               | URL                                                                                                                                                                                                                               | Year founded | Sponsor(s)                                                                                          | Country of host |
|------------------------------------------------|-------------------------------------------------------------------------------------|-----------------------------------------------------------------------------------------------------------------------------------------------------------------------------------------------------------------------------------|--------------|-----------------------------------------------------------------------------------------------------|-----------------|
| AcademyHealth                                  | EDM Forum                                                                           | <a href="http://repository.academyhealth.org/do/discipline_browser/articles?discipline_key=648">http://repository.academyhealth.org/do/discipline_browser/articles?discipline_key=648</a>                                         | NA           | Agency for Healthcare Research and Quality                                                          | USA             |
| Accreditation Canada                           | Leading Practices Database                                                          | <a href="http://www.accreditation.ca/leading-practices">http://www.accreditation.ca/leading-practices</a>                                                                                                                         | NA           | Accreditation Canada                                                                                | Canada          |
| Canadian Foundation for Healthcare Improvement | Patient Engagement Resource Hub                                                     | <a href="http://www.cfhi-fcass.ca/WhatWeDo/PatientEngagement/PatientEngagementResourceHub/Results.aspx">http://www.cfhi-fcass.ca/WhatWeDo/PatientEngagement/PatientEngagementResourceHub/Results.aspx</a>                         |              | Health Canada through 2010 Canadian Partnership Against Cancer                                      | Canada          |
| Canadian Health Human Resources Network        | HHR Innovations Portal                                                              | <a href="http://www.hhr-rhs.ca/index.php?option=com_content&amp;view=article&amp;id=565&amp;Itemid=161&amp;lang=en">http://www.hhr-rhs.ca/index.php?option=com_content&amp;view=article&amp;id=565&amp;Itemid=161&amp;lang=en</a> |              | Health Canada and 2010 Canadian Institutes of Health Research                                       | Canada          |
| Healthcare Improvement Scotland                | Positive and Innovative Resources: A Mental Health Interactive Database (PIRAMHIDS) | <a href="http://www.piramhids.com/home.aspx">http://www.piramhids.com/home.aspx</a>                                                                                                                                               | NA           | Healthcare Improvement Scotland (formerly NHS Quality Improvement Scotland) and Scottish Government | UK              |
| Healthy Mendocino                              | Promising Practices                                                                 | <a href="http://www.healthymendocino.org/index.php?controller=index&amp;module=PromisePractice&amp;action=index">http://www.healthymendocino.org/index.php?controller=index&amp;module=PromisePractice&amp;action=index</a>       | NA           | Healthy Mendocino                                                                                   | USA             |
| IDEAS                                          | ShareIDEAS: Health Care Quality Improvement Project Repository                      | <a href="http://shareideas.ca/">http://shareideas.ca/</a>                                                                                                                                                                         | NA           | Government of Ontario                                                                               | Canada          |
| Institute for Healthcare Improvement           | Institute for Healthcare Improvement Resources                                      | <a href="http://www.ihl.org/resources/Pages/default.aspx">http://www.ihl.org/resources/Pages/default.aspx</a>                                                                                                                     | NA           | Funded through fee-based program and support of various foundations, companies and individuals      | USA             |

|                                               |                                                    |                                                                                                                                               |                                               |     |
|-----------------------------------------------|----------------------------------------------------|-----------------------------------------------------------------------------------------------------------------------------------------------|-----------------------------------------------|-----|
| NHS Improving Quality                         | Resource Search > Case Studies                     | <a href="http://www.nhsiq.nhs.uk/resource-search/case-studies.aspx">http://www.nhsiq.nhs.uk/resource-search/case-studies.aspx</a>             | 2013 NHS                                      | UK  |
| NHS Scotland                                  | Quality Improvement Hub > Case Studies             | <a href="http://www.qihub.scot.nhs.uk/knowledge-centre/case-studies.aspx">http://www.qihub.scot.nhs.uk/knowledge-centre/case-studies.aspx</a> | NHS Scotland                                  | UK  |
| The Commonwealth Fund                         | The Commonwealth Fund Case Studies                 | <a href="http://www.commonwealthfund.org/publications/case-studies">http://www.commonwealthfund.org/publications/case-studies</a>             | The Commonwealth Fund                         | USA |
| The Health Foundation                         | The Health Foundation: Browse Projects and Fellows | <a href="http://www.health.org.uk/browse">http://www.health.org.uk/browse</a>                                                                 | The Health Foundation                         | UK  |
| US Agency for Healthcare Research and Quality | Health Care Innovations Exchange                   | <a href="https://innovations.ahrq.gov">https://innovations.ahrq.gov</a>                                                                       | US Agency for Healthcare Research and Quality | USA |
