# Supplementary material
Source: HighWire-hosted journal article supplement (https://qualitysafety.bmj.com/content/26/4/296)
Supplement: inline-supplementary-material-2 [file inline-supplementary-material-2.pdf]

| Host organization                              | Name of QI repository                                                               | Practice locations            | Number of practices | Earliest date of entry  | Comprehensiveness                                 |
|------------------------------------------------|-------------------------------------------------------------------------------------|-------------------------------|---------------------|-------------------------|---------------------------------------------------|
| AcademyHealth                                  | EDM Forum                                                                           | NA (appears to be mostly USA) | 255                 | 2011                    | Multiple topic areas                              |
| Accreditation Canada                           | Leading Practices Database                                                          | Canada                        | 1033                | 2010                    | Multiple topic areas                              |
| Canadian Foundation for Healthcare Improvement | Patient Engagement Resource Hub                                                     | International                 | 105                 | NA                      | No, topic areas limited to patient engagement     |
| Canadian Health Human Resources Network        | HHR Innovations Portal                                                              | International (mostly Canada) | 52                  | NA                      | No, topic areas limited to health human resources |
| Healthcare Improvement Scotland                | Positive and Innovative Resources: A Mental Health Interactive Database (PIRAMHIDS) | International (mostly UK)     | 100                 | NA (appears to be 2011) | No, topic areas limited to mental health          |
| Healthy Mendocino                              | Promising Practices                                                                 | International (mostly USA)    | 2178                | NA                      | Multiple topic areas                              |
| IDEAS                                          | ShareIDEAS: Health Care Quality Improvement Project Repository                      | Canada                        | 56                  | 2014                    | Multiple topic areas                              |
| Institute for Healthcare Improvement           | Institute for Healthcare Improvement Resources                                      | International (mostly USA)    | 446                 | NA                      | Multiple topic areas                              |
| NHS Improving Quality                          | Resource Search > Case Studies                                                      | NA (appears to be UK only)    | 60                  | 2012                    | Multiple topic areas                              |
| NHS Scotland                                   | Quality Improvement Hub > Case Studies                                              | UK                            | 114                 | NA                      | Multiple topic areas                              |
| The Commonwealth Fund                          | The Commonwealth Fund Case Studies                                                  | International (mostly USA)    | 103                 | 2008                    | Multiple topic areas                              |
| The Health Foundation                          | The Health Foundation: Browse Projects and Fellows                                  | UK                            | 262                 | 2013                    | Multiple topic areas                              |
| US Agency for Healthcare Research and Quality  | Health Care Innovations Exchange                                                    | USA                           | 919                 | NA                      | Multiple topic areas                              |
