# Supplementary material
Source: HighWire-hosted journal article supplement (https://qualitysafety.bmj.com/content/26/4/296)
Supplement: inline-supplementary-material-3 [file inline-supplementary-material-3.pdf]

| Host organization                              | Name of QI repository                                                               | Content sources                   | Submission process                                                                                                                        | Inclusion criteria                                                                                                                                                                                                                                                                                                                                                      | Evidence appraisal                                                                                            | Updating                                                | Removal |
|------------------------------------------------|-------------------------------------------------------------------------------------|-----------------------------------|-------------------------------------------------------------------------------------------------------------------------------------------|-------------------------------------------------------------------------------------------------------------------------------------------------------------------------------------------------------------------------------------------------------------------------------------------------------------------------------------------------------------------------|---------------------------------------------------------------------------------------------------------------|---------------------------------------------------------|---------|
| AcademyHealth                                  | EDM Forum                                                                           | User submitted                    | Users must be registered; most practices are submitted electronically, but a form is available by postal mail                             | NA (but may be available behind login wall)                                                                                                                                                                                                                                                                                                                             | No, but most practices are published in a peer reviewed open access journal                                   | NA, entries contain practice summary and link to papers | NA      |
| Accreditation Canada                           | Leading Practices Database                                                          | User submitted (health care orgs) | Online submission form (submissions are reviewed by Accreditation Canada and an external committee; submitters notified within 6-8 weeks) | Practice must be<br>1. Innovative and creative;<br>2. Client or family centred;<br>3. Evaluated; 4. Able to demonstrate intended results; 5. Sustainable; 6. Adaptable by other organizations                                                                                                                                                                           | No                                                                                                            | NA                                                      | NA      |
| Canadian Foundation for Healthcare Improvement | Patient Engagement Resource Hub                                                     | Selected by QIR + user submitted  | Selected by QIR (not clear how) + users can recommend resources via email                                                                 | Questions to identify resources for inclusion: Is it a tool that will help organizations involve patients, families and caregivers in the design, delivery and evaluation of healthcare services (beyond their own individual treatment)? Is it a tool that an organization can use and/or adapt for its own purposes?                                                  | No                                                                                                            | NA                                                      | NA      |
| Canadian Health Human Resources Network        | HHR Innovations Portal                                                              | User submitted                    | Users complete CHHRN Innovation Submission Form and submit via email                                                                      | 1. Must be HHR related; 2. Must fall within one of the five HHR themes [See search categories]; 3. Should fall into one or more of the following descriptions: a) Models of care, roles or practices; b) tools or resources; c) guides or frameworks; d) methods, approaches or strategies; e) programs or services; f) legislation, policies and standards of practice | No                                                                                                            | NA                                                      | NA      |
| Healthcare Improvement Scotland                | Positive and Innovative Resources: A Mental Health Interactive Database (PIRAMHIDS) | User submitted                    | Registered users complete a submission template and submit via user account                                                               | Positive or innovative practices                                                                                                                                                                                                                                                                                                                                        | Case studies include a subsection "Evidence Base for Practice" and are subject to a quality assurance process | NA                                                      | NA      |

|                                      |                                                                |                                                                                                    |                                                                       |                                                                                                                                                                                                                                                                                  |                                                                                                     |                                                        |    |
|--------------------------------------|----------------------------------------------------------------|----------------------------------------------------------------------------------------------------|-----------------------------------------------------------------------|----------------------------------------------------------------------------------------------------------------------------------------------------------------------------------------------------------------------------------------------------------------------------------|-----------------------------------------------------------------------------------------------------|--------------------------------------------------------|----|
| Healthy Mendocino                    | Promising Practices                                            | User submitted                                                                                     | Users submit online form; upon submission, staff review for inclusion | Inclusion: Programs, interventions, strategies, and policies; may or may not be evidence based; designed to improve health and quality of life through community and population based approaches; Exclusion: Selling a product; clinical in nature; pharmaceutical interventions | Yes; QIR assigns rating: Evidence-Based Practice; Effective Practice; Good Idea [NB. Detailed page] | NA                                                     | NA |
| IDEAS                                | ShareIDEAS: Health Care Quality Improvement Project Repository | IDEAS projects only (submitters include healthcare professionals, managers and executives)         | Users submit a Project Reporting Template via email                   | Must be an applied improvement project completed as part of the IDEAS program                                                                                                                                                                                                    | No                                                                                                  | Every 6 months QIR staff contact submitter for updates | NA |
| Institute for Healthcare Improvement | Institute for Healthcare Improvement Resources                 | Unclear                                                                                            | Unclear                                                               | No explicit criteria; improvement stories “describe the improvement journeys and experiences of individual teams and organisations”; case studies are “related to improving health care”                                                                                         | No, but users can rate entries on a 5-point scale                                                   | NA                                                     | NA |
| NHS Improving Quality                | Resource Search > Case Studies                                 | NA                                                                                                 | NA                                                                    | NA                                                                                                                                                                                                                                                                               | No                                                                                                  | NA                                                     | NA |
| NHS Scotland                         | Quality Improvement Hub > Case Studies                         | NHS Boards                                                                                         | NA                                                                    | NA                                                                                                                                                                                                                                                                               | No                                                                                                  | NA                                                     | NA |
| The Commonwealth Fund                | The Commonwealth Fund Case Studies                             | Unclear                                                                                            | Unclear                                                               | No explicit criteria; appears to be projects funded by the parent org                                                                                                                                                                                                            | No                                                                                                  | NA                                                     | NA |
| The Health Foundation                | The Health Foundation: Browse Projects and Fellows             | Unclear; appears that projects funded by the organization are automatically included in repository | NA                                                                    | Projects funded by the organization to “improve quality of healthcare in the UK”                                                                                                                                                                                                 | No                                                                                                  | NA                                                     | NA |

|                                               |                                  |                |                                                                                                                                          |                                                                                                                                                                                                                                                                                                                                                                                                                                                                                                                                                                                          |                                                                                                                                                                                                                                                                                                                            |                                                                               |    |
|-----------------------------------------------|----------------------------------|----------------|------------------------------------------------------------------------------------------------------------------------------------------|------------------------------------------------------------------------------------------------------------------------------------------------------------------------------------------------------------------------------------------------------------------------------------------------------------------------------------------------------------------------------------------------------------------------------------------------------------------------------------------------------------------------------------------------------------------------------------------|----------------------------------------------------------------------------------------------------------------------------------------------------------------------------------------------------------------------------------------------------------------------------------------------------------------------------|-------------------------------------------------------------------------------|----|
| US Agency for Healthcare Research and Quality | Health Care Innovations Exchange | User submitted | Users submit a candidate innovation for consideration by contacting the QIR by email and answering specific questions about the practice | The innovation relates to patient care delivery processes or involves health care policy; the innovation aims to improve one or more domains of health care quality; the activity or policy is truly innovative in the context of its setting or target population; information about the innovation is publicly available; the innovator will contribute information to Innovations Exchange; there is reason to believe the innovation will be effective; Excludes: product or technical, educational, clinical or innovations without any evidence of effect [NB. very detailed page] | Yes; each entry includes an Evidence Rating, which is an assessment of the quality and strength of the evidence and that the results described in the profile are due to the innovation and not to other factors; categories for rating strength of evidence are Strong, Moderate, and Suggestive [NB. very detailed page] | Submitter is invited to review, update and verify the practice profile annual | NA |
|-----------------------------------------------|----------------------------------|----------------|------------------------------------------------------------------------------------------------------------------------------------------|------------------------------------------------------------------------------------------------------------------------------------------------------------------------------------------------------------------------------------------------------------------------------------------------------------------------------------------------------------------------------------------------------------------------------------------------------------------------------------------------------------------------------------------------------------------------------------------|----------------------------------------------------------------------------------------------------------------------------------------------------------------------------------------------------------------------------------------------------------------------------------------------------------------------------|-------------------------------------------------------------------------------|----|
