# Supplementary material
Source: HighWire-hosted journal article supplement (https://qualitysafety.bmj.com/content/26/4/296)
Supplement: inline-supplementary-material-4 [file inline-supplementary-material-4.pdf]

| Host organization                              | Name of QI repository                                                               | Content structure                                                                                                                                                                                                         | Types of content                                                       | Search functionality                                                                                                                                                                                 |
|------------------------------------------------|-------------------------------------------------------------------------------------|---------------------------------------------------------------------------------------------------------------------------------------------------------------------------------------------------------------------------|------------------------------------------------------------------------|------------------------------------------------------------------------------------------------------------------------------------------------------------------------------------------------------|
| AcademyHealth                                  | EDM Forum                                                                           | Title; Authors; Submission type; Keywords; Abstract; Creative commons license; DOI; Recommended citation                                                                                                                  | Text + link to document (e.g., PDF)                                    | Keyword search                                                                                                                                                                                       |
| Accreditation Canada                           | Leading Practices Database                                                          | Title; Organization; Sector; Province/Territory; Year; Category; Type of Practice; Contact Info; Summary [NB. Practices are not consistently organized]                                                                   | Text                                                                   | No keyword search, but Title and Organization search + Filters (Category; year; Type of Practice; Province/Territory; Sector)                                                                        |
| Canadian Foundation for Healthcare Improvement | Patient Engagement Resource Hub                                                     | Title; Summary; Source; Stage; Language availability                                                                                                                                                                      | Text + links to project source website and/or document (e.g., PDF)     | Keywords + Categories (Assess; Design; Implement; Monitor and Evaluate)                                                                                                                              |
| Canadian Health Human Resources Network        | HHR Innovations Portal                                                              | Innovation name; Innovation type; Jurisdiction; Link/Information                                                                                                                                                          | Text + links to project source website and/or document (e.g., PDF)     | No keyword search; entries listed by categories (HHR Planning; Scopes of Practice and Models of Care; Mobility and Migration; Rural, Remote and Aboriginal; Quality of Worklife; Crosscutting Theme) |
| Healthcare Improvement Scotland                | Positive and Innovative Resources: A Mental Health Interactive Database (PIRAMHIDS) | 3 main tabs: Case Study (incl Contact info; Evidence base for practice, Quality assurance/ impact of practice; Practice summary; Practice detail; Challenges; Additional comments); Additional Information; Comments      | Text + links to project source, useful links, documents (e.g., PDF)    | Keyword + Filters (National; Types of care; Care groups)                                                                                                                                             |
| Healthy Mendocino                              | Promising Practices                                                                 | Title; Evidence rating; Goal/Mission; Results/Accomplishments; About this Promising Practice (Contact; Categories; Organization; Source; Date of publication; Location; External links; Target audience); Related content | Text + links to related internal and external content                  | Keyword + Sorting (Relevance; Topic) + Filters (Ranking; Featured; Primary Target Audience; Topics and Sub-Topics; Geographic Type)                                                                  |
| IDEAS                                          | ShareIDEAS: Health Care Quality Improvement Project Repository                      | QI Project; Health Theme; Health Sector; Location: Project Timeframe; Summary; Approach; Measures; Results and Enablers; Lessons Learned; Contact Info                                                                    | Text                                                                   | Keyword + Filters (Health Theme; Health Sector; Location; Project Timeframe)                                                                                                                         |
| Institute for Healthcare Improvement           | Institute for Healthcare Improvement Resources                                      | Case study varies; name, author, description, links to related content; improvement stories vary: incl title/name, profile/description                                                                                    | Text; often links to external content, incl web pages/sites, documents | No dedicated key word search; entries are listed by categories; within categories, individual entries are listed                                                                                     |
| NHS Improving Quality                          | Resource Search > Case Studies                                                      | Title; Date; Key points; Summary; Downloadable full case study                                                                                                                                                            | Text + link to document (e.g., PDF)                                    | Keyword + Filters (Care setting; Health conditions; Care pathway stage; Personal background and demographics; Date)                                                                                  |

|                                               |                                                    |                                                                                                                                                                                                                                              |                                     |                                                                                                                                                                                                                                                                              |
|-----------------------------------------------|----------------------------------------------------|----------------------------------------------------------------------------------------------------------------------------------------------------------------------------------------------------------------------------------------------|-------------------------------------|------------------------------------------------------------------------------------------------------------------------------------------------------------------------------------------------------------------------------------------------------------------------------|
| NHS Scotland                                  | Quality Improvement Hub > Case Studies             | NHS Board; Contact name; Contact email; Title; Category; Background/context; Problem; Aim; Action taken; Results; Patient experience; (e.g., PDF) Staff experience; Efficiency savings and productive gains; Sustainability; Lessons learned | Text + link to document             | No keyword search; entries organized by new and archived and "workstreams"                                                                                                                                                                                                   |
| The Commonwealth Fund                         | The Commonwealth Fund Case Studies                 | Title, pub date, authors, contact, citation, links to downloadable content, links to related content, overview                                                                                                                               | Text + links to related content     | Keyword search; refine search by topic (health system performance and costs, state health policy and medicaid, accountable care orgs, care coordination, vulnerable populations, medicare, international health policy centre) or recent authors                             |
| The Health Foundation                         | The Health Foundation: Browse Projects and Fellows | Info varies, but all include at least title; bullet point summary; text summary; some also include further reading, why we're doing it, contact info                                                                                         | Text + related downloadable content | Basic keyword search + Sorting (All; Research projects; Improvement projects; Fellows) + Project categories (Project focus; clinical area; Setting; Who's involved; Location; QI method; Programme) [NB. Project categories contain numerous sub-categories]                 |
| US Agency for Healthcare Research and Quality | Health Care Innovations Exchange                   | Title; Snapshot; What they did; Did it work; How they did it; Adoption considerations; More info (incl contact); Original pub date; Last updated; Date verified by innovator; Comments [NB. Entries are very detailed]                       | Text + links to related materials   | Keyword search + Categories (Disease or Clinical; IOM domains of quality; Organizational processes affected by the innovation; patient care process; patient population; Quality Improvement goals and mechanisms; QualityTool topic; Setting of care; Stage of care; State) |
