# Supplementary material
Source: HighWire-hosted journal article supplement (https://qualitysafety.bmj.com/content/26/4/296)
Supplement: inline-supplementary-material-5 [file inline-supplementary-material-5.pdf]

| Host organization                              | Name of QI repository                                                               | QI repository evaluation | User engagement                                                                                                                                |
|------------------------------------------------|-------------------------------------------------------------------------------------|--------------------------|------------------------------------------------------------------------------------------------------------------------------------------------|
| AcademyHealth                                  | EDM Forum                                                                           | NA                       | Twitter; email notifications; RSS feed                                                                                                         |
| Accreditation Canada                           | Leading Practices Database                                                          | NA                       | Twitter; LinkedIn                                                                                                                              |
| Canadian Foundation for Healthcare Improvement | Patient Engagement Resource Hub                                                     | NA                       | Newsletter subscription; Twitter; Facebook; SlideShare; YouTube; LinkedIn                                                                      |
| Canadian Health Human Resources Network        | HHR Innovations Portal                                                              | NA                       | Twitter; LinkedIn; YouTube; Parent org has listserv and membership option                                                                      |
| Healthcare Improvement Scotland                | Positive and Innovative Resources: A Mental Health Interactive Database (PIRAMHIDS) | NA                       | Registered users can comment on case studies and participate in online discussion forum                                                        |
| Healthy Mendocino                              | Promising Practices                                                                 | NA                       | No                                                                                                                                             |
| IDEAS                                          | ShareIDEAS: Health Care Quality Improvement Project Repository                      | NA                       | Facebook; Twitter; LinkedIn; Parent org has email list                                                                                         |
| Institute for Healthcare Improvement           | Institute for Healthcare Improvement Resources                                      | NA                       | Newsletter; user comments on each entry; twitter, facebook, linkedin, blogger; blogs and user groups                                           |
| NHS Improving Quality                          | Resource Search > Case Studies                                                      | NA                       | SlideShare; Wordpress blog; YouTube; Pinterest; Twitter                                                                                        |
| NHS Scotland                                   | Quality Improvement Hub > Case Studies                                              | NA                       | Twitter; The Leading Quality Network blogs                                                                                                     |
| The Commonwealth Fund                          | The Commonwealth Fund Case Studies                                                  | NA                       | e-alerts and newsletters, users can create an account and customize personal library, email project contact, 291 ways to share on social media |
| The Health Foundation                          | The Health Foundation: Browse Projects and Fellows                                  | NA                       | Comments section; user accounts; newsletter subscription; Facebook; Twitter; LinkedIn; YouTube                                                 |
| US Agency for Healthcare Research and Quality  | Health Care Innovations Exchange                                                    | NA                       | Email updates; LinkedIn; Facebook; Twitter; YouTube; Comments sections for each entry                                                          |
